## **Identification of Blood-based Non-invasive Biomarkers and Therapeutic Agents against Pancreatic Ductal Adenocarcinoma (PDAC): A Network-based Study**

Md. Asad Ullah<sup>1,2\*</sup>, Bishajit Sarkar<sup>1,2</sup>, Fayza Akter<sup>1</sup>

<sup>1</sup>Department of Biotechnology and Genetic Engineering, Faculty of Biological Sciences, Jahangirnagar University, Dhaka, Bangladesh

<sup>2</sup>Swift Integrity Computational Lab, Dhaka, Bangladesh

Correspondence: [\\*ullah1194@gmail.com](mailto:*ullah1194@gmail.com)

## **Abstract**

Pancreatic Ductal Adenocarcinoma (PDAC) is the most demolishing form of pancreatic cancer with poor prognosis and rising incidence. Difficulties in the early detection and aggressive biological nature of this disease are responsible for most of the therapeutic failures. In this study publicly available microarray expression data of full RNA from peripheral blood of PDAC patient has been utilized via network-based approach in order to identify potential non-invasive biomarkers and drug targets for early diagnosis and treatment of PDAC. Analysis of differentially expressed genes revealed their predominant involvement in translational process, apoptotic process, protein phosphorylation, immune responses, ATP binding, protein binding and signal transduction. Moreover, CREBBP, MAPK14, MAPK1, SMAD3, UBC, MAGOH, HSP90AB1, RPL23A, ACTB and STAT3 were identified as the best proteome signatures, GATA2, FOXC1, PPARG, E2F1, HINFP, USF2, MEF2A, FOXL1, YY1 and NFIC were identified as the best transcriptional regulatory signatures, and hsa-miR-93, hsa-miR-16, hsa-miR-195, hsa-miR-424, hsa-miR-506, hsa-miR-124, hsa-miR-590-3p, hsa-miR-1, hsa-miR-497 and hsa-miR-9 were identified as the best post-transcriptional regulatory signatures in PDAC patient. Analysis of drug-gene interaction revealed Anisomycin, Azactidine, Arsenic trioxide, Bortezomib, Ulixertinib and some other molecules as the probable candidate molecules which may reverse PDAC condition.

**Keywords:** Adenocarcinoma; Biomarkers; Cancer; Pancreatic; PDAC; Treatment

## 1. Introduction

Pancreatic Ductal Adenocarcinoma (PDAC) is by far the most common type of devastating exocrine neoplastic and chemo resistant cancer, concerning 90% of all pancreatic cancers (Orth et al., 2019). This cancer originates in the ducts that carry secretions of digestive enzymes and bicarbonate away from the pancreas. Pancreatic cancer is rarely diagnosed before 55 years of age, mainly the highest incidence is reported in people over 70 years (Siri and Salehiniya, 2019). Though, there has no evidence what causes this cancer in most of cases, many researchers are identified some genetic and environmental factors (obesity, smoking, diabetes etc.) are intertwined in the development of PDAC. This cancer occurs when cells in our pancreas especially in the duct line develop mutations in the DNA that causes cells to grow uncontrollably and to continue living further can form a tumor. Malignancy can spread to nearby organs and blood vessels if the cell remains untreated for the long time (Adamska et al., 2017). Furthermore, 25% of people survive one year and 5% live for five years for the lack of apparent and particular symptoms and reliable biomarkers for early diagnosis as well as aggressive metastatic spread leading to poor response to treatments (Maitra and Hruban, 2008). Globally, 458,918 new cases of pancreatic cancer have been reported in 2018, and 355,317 new cases are estimated to occur until 2040 (Rawla et al., 2019). By 2030, researchers project that pancreatic cancer will become the 2nd leading cause of cancer related death in the US after lung cancer, surpassing colorectal, breast, and prostate cancer (Rahib et al., 2014). Moreover, currently accessible therapeutic options are surgery, radiation, chemotherapy, immunotherapy, and use of targeted drugs. But these are not effective as later stage detection causes metastasis additionally it is expensive too

(Charsi, 2007; Orth et al., 2019). Therefore, there is an increasing demand for the development of novel, effective strategies aiming to advance current therapeutic possibilities.

Microarray data is now being increasingly used to assume the function of differentially expressed genes (DEGs) which are not currently available (Ullah et al., 2019; Hatfield et al., 2003). And DEGs identified from microarray data can be used in the robust identification of biomarkers. However, these studies provide fruitful findings but the understanding of actual mechanism of biological condition using the data of differentially expressed genes (DEGs) is often difficult and may sometime come with erroneous interpretation (Pepe et al., 2003; Crow et al., 2019).

In this study we have employed network-based approach to identify potential molecular signatures which could be used as biomarkers or drug targets in the early diagnosis and treatment of PDAC. We have also employed strategy to identify drug-gene interactions in PDAC in order to select feasible therapeutic molecule for the treatment of PDAC (**Figure 1**).

## **2. Materials and Methods**

### ***2.1. Data Retrieval and Identification of Differentially Expressed Genes***

We retrieved GSE74629 microarray data from NCBI-GEO (National Center for Biotechnology Information-Gene Expression Omnibus) database (Caba et al., 2015). The dataset comprises the expression profile of total RNA from peripheral blood of 36 PDAC patients and 14 age, gender and habit matched healthy people. The presence of PDAC was confirmed by histological biopsy or imaging-guided biopsy. After retrieval, the data was statistically analyzed using GEAP (Gene Expression Analysis Platform) to differentiate the upregulated and downregulated genes (Nunes et al., 2018). Log<sub>2</sub> transformation was applied and differentially expressed genes (DEGs) were

sorted with adjusted P value<0.01 filter since the lower value corresponds to more accurate prediction.

## ***2.2. Functional Enrichment Analysis of DEGs***

Both upregulated and downregulated gene sets were analyzed by DAVID (Database for Annotation, Visualization, and Integrated Discovery) (version 6.8) for gene over-representation to elucidate gene ontology (GO) terms and pathways involved with DEGs (Sherman and Lempicki, 2009). P values were adjusted using the Hochberg and Benjamini test and gene count >15 were set as the cut-off point during the analysis.

## ***2.3. Construction of Protein-Protein Interaction Network and Identification of Hub Proteins***

STRING (Search Tool for the Retrieval of Interacting Genes/Proteins) database was utilized for the construction of generic protein-protein interaction (PPI) network with NetworkAnalyst (Szklarczyk et al., 2017; Xia et al., 2015). Topological and expression analysis of the DEGs were performed using NetworkAnalyst. Hub proteins in the generic PPI network with top 10 most connected nodes were identified with cytoHubba plugin using betweenness centrality interaction matrix on Cytoscape (version 3.7.2) (Chin et al., 2014; Shannon et al., 2003). Then the functional enrichment of the hub proteins was also analyzed.

## ***2.4. Identification of Regulatory Molecules***

DEGs were searched against JASPAR which is an open access, curated and non-redundant database of DNA binding transcription factors, with the help of NetworkAnalyst to construct transcription factor (TF)-DEGs interaction network (Sandelin et al., 2004). Micro RNA

(miRNA)-DEGs interaction network was constructed searching the DEGs against TarBase, a manually curated microRNA database that includes almost 1,300 experimentally supported targets (Sethupathy et al., 2006). Top 10 interacting TFs and miRNAs were selected and analyzed.

### ***2.5. Identification of Small Therapeutic Candidate Molecules***

After the identification of hub proteins and regulatory biomolecule signatures, the selected signatures were then analyzed by DGidb (Drug Gene Interaction Database) (version 3.0) database that presents drug-gene interaction and gene druggability information in order to identify potential therapeutic candidate molecules that may reverse the PDAC condition (Cotto et al., 2017). Best observed therapeutic molecules according to specific target were then selected.

## **3. Result**

### ***3.1. Transcriptome Signatures***

Publicly available microarray data of total RNA profile from peripheral blood of PDAC patient and control was retrieved for statistical analysis. A total of 1910 differentially expressed genes were identified with 681 upregulated and 1229 downregulated genes were identified within the defined parameter (**Figure 2**).

After that both upregulated and downregulated gene sets were analyzed sequentially to understand their functional enrichment reflecting Gene Ontology (GO) terms and enriched pathway. GO aids in understanding the involvements of the genes in context of Biological Processes, Cellular Compartmentation and Molecular Function. Top 10 GO terms for both

upregulated and downregulated gene sets were retrieved (**Table 1**). Among the identified terms of upregulated genes, 55 genes were found to be involved in signal transduction and 31 genes were involved in innate immune response. Again, Protein Phosphorylation, Apoptotic Processes and Viral Processes were the next predominant GO terms. Moreover, the upregulated genes were also predominant in ATP binding, protein binding and Protein homodimerization activity and they were shown to act mainly in cytoplasm, cytosol and plasma membrane.

Among the downregulated genes, 54, 50 and 44 genes were found to be involved in rRNA processing, Translation and Translational Initiation respectively. Additionally, they were found to be involved in protein binding and RNA binding and also observed to act predominantly in cytosol and nucleus.

Moreover, The DEGs were then again subjected to analyze their involvement in biological pathway. Selected genes showed sign of their involvement in KEGG (Kyoto Encyclopedia of Genes and Genomes) pathway (**Figure 3**).

### ***3.2. Proteome Signatures***

After functional enrichment analysis, the DEGs were used to construct protein-protein interaction (PPI) network. A densely connected scale free network was constructed for the DEGs (**Figure 4**). Then the generic PPI map was used to identify the hub proteins using the betweenness centrality matrix. CREBBP, MAPK14, MAPK1, SMAD3, UBC, MAGOH, HSP90AB1, RPL23A, ACTB and STAT3 were identified as the most connected nodes (Hub proteins) (**Figure 5**) (**Table 2**). Then the functional enrichment of the hub proteins was analyzed. The identified proteins were primarily involved in positive regulation of protein transport into nucleus (P value: 8.30E-06), Regulation of immune response (P value: 1.32E-05) and

posttranscriptional regulation of gene expression (P value: 1.32E-05). They were also found to be involved in phosphatase binding and performing predominantly in nucleus.

### ***3.3. Regulatory Signatures***

The DEGs were analyzed to identify transcriptional (TFs) and post-transcriptional (miRNAs) regulatory biomolecules. GATA2, FOXC1, PPARG, E2F1, HINFP, USF2, MEF2A, FOXL1, YY1 and NFIC were identified as the best transcriptional (TFs) regulatory biomolecules (**Figure 6**) (**Table 3**). And, hsa-miR-93, hsa-miR-16, hsa-miR-195, hsa-miR-424, hsa-miR-506, hsa-miR-124, hsa-miR-590-3p, hsa-miR-1, hsa-miR-497 and hsa-miR-9 were identified as the best post-transcriptional (miRNAs) regulatory biomolecules (**Figure 7**) (**Table 4**).

### ***3.4. Identification of Therapeutic Candidate Molecules***

Identified hub proteins and transcription factors were analyzed for their interaction with candidate molecules that could be used to reverse the PDAC condition. CREBBP, MAPK1, MAPK14, GRB2 and RPL23A among 10 hub proteins were reported to have significant interactions with candidate molecules (**Table 5**). Among the selected transcription factors, GATA2, PPARG and E2F1 showed interactions with multiple candidate molecules. Arsenic Trioxide, Dactinomycin, Bortezomib, Azactidine, Paclitaxel, Flourouracil and Carmustine were reported to be myelosuppressive agents. Anisomycin and Dactinomycin have nucleic acid synthesis inhibitory capability. Moreover, multiple candidate molecules were reported to be enzyme inhibitors.

## **4. Discussion**



After statistical analysis 1910 differentially expressed genes were identified with 681 upregulated and 1229 downregulated genes within the defined parameter which was then employed to analyze the functional enrichment.

Gene co-expression analysis and interaction network allows to identify functionally co-related genes, assume their tentative functions, identify regulatory biomolecules and understand disease-gene interactions (Van et al., 2017; Rhee et al., 2008). Upregulated and downregulated genes were found to be predominantly involved in translational process, apoptotic process, protein phosphorylation, immune responses, ATP binding, protein binding and signal transduction (**Table 1**). Protein phosphorylation is the most important post translational event in signal transduction which plays crucial role to mediate the cell signaling and its hyperactivity, malfunction or overexpression is mostly encountered in tumor and cancer development (Ardito et al., 2017). Altered apoptotic profile is a common clinical feature in pancreatic cancer (Bafna et al., 2009). PDAC involves an elevated level of both inflammatory and regulatory immune cells (Shibuya et al., 2014). Overexpression of ATP binding cassette protein has been observed in pancreatic cancer cells (Chen et al., 2012).

Protein-protein interaction (PPI) network provides useful insight into the functional organization of many proteins which promotes the understanding of complex molecular relationship to determine the phenotype of a cell (Stelzl and Wanker, 2006). Hub proteins are the most connected nodes in a PPI network that provides significant information about the function of the network (He and Zhang, 2006). Among, the selected 10 hub proteins, CREBBP is a transcriptional co-activator and its inhibition has been shown to suppress PDAC (Arensman et al., 2014) (**Table 2**). CREBBP has also been shown to play crucial role in lung cancer which was evident by its knockdown that resulted in the inhibition of lung cancer and induction of apoptosis

(Tang et al., 2016). MAPK14 is a serine-threonine specific kinase that phosphorylates different proteins. MAPK14 dependent phosphorylation has been shown to mediate epithelial to mesenchymal transition in breast cancer cell (Hedrick and Safe, 2017). MAPK1 is another serine-threonine specific kinase and its overexpression has been reported in cervical cancer cells. MAPK1 has also been suggested to be constitutively active in absence of DUSP6 and leading to worsening prognosis of pancreatic cancer (Li et al., 2015; Furukawa, 2009). HSP90AB1 is a molecular chaperone and it promotes epithelial-mesenchymal transition in lung cancer (Wang et al., 2019). SMAD3 is a signal transducer and epithelial to mesenchymal transition in PDAC is mediated by upregulated SMAD3 (Yamazaki et al., 2014). STAT3, a signal transducer, whose overexpression has been shown to be correlated with VEGF (Vascular Endothelial Growth Factor) in pancreatic cancer. Constitutively activated STAT3 has been shown to be involved with elevated VEGF which then mediate angiogenesis and metastasis. Blockade of STAT3 showed suppression of VEGF expression (Wei et al., 2003). ACTB is a structural protein and it is essential for the maintenance of cytoskeletal structure and kinetics. 1.7 fold increase in expression of ACTB has been observed in pancreatic cancerous cells. However, ACTB overexpression has also been reported with other type of cancers i.e., lung cancer, colorectal cancer, liver cancer etc. (Rubie et al., 2005; Guo et al., 2013). MAGOH is a component of spliceosome and is required for splicing premature mRNA inside the cell. Differential expression of specific mRNA transcript has been correlated with MAGOH expression in breast cancer and this was evident by the knockdown of MAGOH along with other spliceosome factors which resulted in different pattern of mRNA production (Stricker et al., 2017). RPL23A is a component of ribosome and mediates the protein synthesis inside cell. Increased level of RPL23A expression has been observed in liver cancer (Molavi et al., 2019). UBC is responsible for

ubiquitylation of many proteins inside cell. Downregulation of UBC has been shown to inhibit the proliferation of small cell lung cancer (Tang et al., 2015). Overexpression of UBC gene was observed in renal cancer cell (Kanayama et al., 1991).

Both transcription factors and microRNAs play crucial role in the expression of widespread genes inside human body (Martinez and Walhout, 2009). And the interactome network of these regulatory biomolecules provides crucial and valid information about the biological functions of these molecules and their involvement with disease (Vidal et al., 2011). Mostly connected 10 TFs and miRNAs were selected from TFs-DEGs and miRNA-DEGs interactome network (**Table 3**). Among the selected TFs, GATA2 has been reported to be overexpressed and accused as the metastasis-driving factor in prostate cancer (Chiang et al., 2014). High expression of both FOXC1 mRNA and protein has been observed in western blot and immunohistochemistry experiment with PDAC tissue (Wang et al., 2013). PPARG mutation has been observed in case of PDAC and some other form of cancers (Wang et al., 2015). Inhibition of PPARG by specific inhibitor has been shown to induce growth arrest of pancreatic carcinoma cells (Elnemr et al., 2000). E2F1 is essential for the S phase transition of PDAC cell (Schild et al., 2009). HINFP is responsible for regulating cell cycle and differential expression of this protein has been observed in different cancer cell lines (Holmes et al., 2005, van et al., 2009). Differential expression of USF-2 has been observed for bronchial dysplasia and non-adenocarcinoma lung cancer and this protein has been suggested as the early marker of lung cancer (Ocejo-Garcia et al., 2005). MEF2A has been reported to promote hepatocellular carcinoma (Pon and Marra, 2016). High expression of FOXL1 in PDAC tissue has been shown to promote the clinical outcome whereas lower expression is suggested to promote metastasis (Zhang et al., 2013). YY1 plays significant

role in the signaling cascade that regulates the PDAC metastasis (Yuan et al., 2017). NFIC has been recently shown to play key role in breast cancer tumorigenesis (Lee et al., 2015).

Among the selected microRNAs, hsa-miR-93 is used as a biomarker for gastric cancer early detection and prognosis prediction (Larki et al., 2018) (**Table 4**). hsa-miR-16 is upregulated in PDAC and acts as a promising biomarker in cancer detection (Huang et al., 2019). hsa-miR-195 inhibits cell proliferation, migration, and invasion which potentially opens new avenues for the treatment of breast cancer (Singh et al., 2015). hsa-miR-424 is over expressed in PDAC patient and helps to characterize PDAC (Lee et al., 2007). hsa-miR-506 has downregulated expression profile in cervical cancer. Additionally, it works to promote apoptosis of cervical cancer cells (Li et al., 2011) hsa-miR-124 has been shown to be downregulated in nasopharyngeal carcinoma (NPC) and dramatically inhibited the cell proliferation, colony formation, migration and invasion in vitro, as well as tumor growth and metastasis in vivo (Peng et al., 2014). hsa-miR-590-3p can be used as a sensitive biomarker in colorectal cancer. It is also tissue-specific and can regulate tumor suppressor genes and oncogenes in different tissues (Elfar et al., 2019). hsa-miR-1 is downregulated in the PDAC group compared with either in the sera samples or in tumor tissues. hsa-miR-1 was frequently decreased in clinical osteosarcoma (OS) tumor tissues and involved in the anticancer effect induced by specific chemical agent (Zhu and Wang, 2016). It also has a negative regulatory role in the proliferation of colon cancer by targeting baculoviral inhibitor of apoptosis protein (Xu et al., 2015). hsa-miR-497 is significantly downregulated in certain types of cancer, including breast, gastric, endometrial, colorectal and prostate cancer. It also inhibits both the migration and invasion of prostate cancer cells (Wu et al., 2016). hsa-miR-9 is upregulated in non-small cell lung cancer (NSCLC). It is also involved in

transforming growth factor- $\beta$  1 (TGF- $\beta$ 1)-induced NSCLC cell invasion and adhesion by targeting SOX7(Han et al., 2017).

DEGs were then analyzed to understand their potential interactions with small candidate molecule (**Table 5**). Among the selected candidate molecules, Arsenic Trioxide has been shown to induce apoptosis in pancreatic cancer cell (Li et al., 2003). Recently, Ulixertinib has been shown to have antitumor activity in PDAC in phase I clinical trial (Jiang et al., 2018). Anisomycin can decrease the proliferation of colorectal cancer cell (Ushijima et al., 2016). Bortezomib can induce apoptosis in PDAC cell (Nawrocki et al., 2005). Azactidine is capable of inducing apoptosis in ovarian cancer cell (Li et al., 2009).

Finally, publicly available microarray data of PDAC patient and control was used to identify potential biomarkers and drug targets using a network-based integrated approach. After continual computational assessment this study found several key proteome and regulatory signatures which may lead to the identification of potential biomarkers and drug targets. This study recommends CREBBP, MAPK14, MAPK1, SMAD3, UBC, MAGOH, HSP90AB1, RPL23A, ACTB and STAT3 as the best proteome signatures, GATA2, FOXC1, PPARG, E2F1, HINFP, USF2, MEF2A, FOXL1, YY1 and NFIC as the best transcriptional regulatory signatures, and hsa-miR-93, hsa-miR-16, hsa-miR-195, hsa-miR-424, hsa-miR-506, hsa-miR-124, hsa-miR-590-3p, hsa-miR-1, hsa-miR-497 and hsa-miR-9 as the best post-transcriptional regulatory signatures in PDAC patient. Moreover, identified signatures were also analyzed for their potential interactions with small candidate molecules. Anisomycin, Azactidine, Arsenic trioxide, Bortezomib, Ulixertinib and some other molecules were reported to have myelosuppressive agent that may reverse the PDAC condition.

## 5. Conclusion

PDAC is one of the most devastating form of cancers for which feasible treatment and early diagnosis techniques are merely available. In this study several genes have been identified which are predominantly involved in translational process, apoptotic process, protein phosphorylation, immune responses, ATP binding, protein binding and signal transduction in PDAC patient. Thereafter, several proteome and regulatory signatures were identified which were found to be involved in PDAC and some other form of cancers. Multiple therapeutic agents were also identified which may reverse PDAC condition. Other *in vitro* study also supported our findings and again we suggest further laboratory experiment to find the best potential biomarker and therapeutic agent for PDAC diagnosis and treatment. Hopefully, this study will raise research interest among researchers and contribute to the identification of feasible biomarker and drug target of PDAC in the upcoming days.

### **Acknowledgement**

Authors are thankful to the members of Swift Integrity Computational Lab, Dhaka, Bangladesh.

### **Conflict of Interest**

Authors declare that there is no conflict of interest regarding the publication of this manuscript.

### **Funding Statement**

Authors received no funding from external sources.

### **Data Availability Statement**

All the data generated and analyzed are summarized in this manuscript.

### **References**

- Adamska, A., Domenichini, A. and Falasca, M., 2017. Pancreatic ductal adenocarcinoma: current and evolving therapies. *International journal of molecular sciences*, 18(7), p.1338
- Ardito, F., Giuliani, M., Perrone, D., Troiano, G. and Lo Muzio, L., 2017. The crucial role of protein phosphorylation in cell signaling and its use as targeted therapy. *International journal of molecular medicine*, 40(2), pp.271-280.
- Arensman, M.D., Telesca, D., Lay, A.R., Kershaw, K.M., Wu, N., Donahue, T.R. and Dawson, D.W., 2014. The CREB-binding protein inhibitor ICG-001 suppresses pancreatic cancer growth. *Molecular cancer therapeutics*, 13(10), pp.2303-2314.
- Bafna, S., Kaur, S., Momi, N. and Batra, S.K., 2009. Pancreatic cancer cells resistance to gemcitabine: the role of MUC4 mucin. *British journal of cancer*, 101(7), p.1155.
- Caba, Octavio, Jose Prados, Raúl Ortiz, Cristina Jiménez-Luna, Consolación Melguizo, Pablo J. Alvarez, Juan R. Delgado et al. "Transcriptional profiling of peripheral blood in pancreatic adenocarcinoma patients identifies diagnostic biomarkers." *Digestive diseases and sciences* 59, no. 11 (2014): 2714-2720.
- Chari, S.T., 2007, August. Detecting early pancreatic cancer: problems and prospects. In *Seminars in oncology* (Vol. 34, No. 4, pp. 284-294). WB Saunders.
- Chen, M., Xue, X., Wang, F., An, Y., Tang, D., Xu, Y., Wang, H., Yuan, Z., Gao, W., Wei, J. and Zhang, J., 2012. Expression and promoter methylation analysis of ATP-binding cassette genes in pancreatic cancer. *Oncology reports*, 27(1), pp.265-269.
- Chiang, Y.T., Wang, K., Crea, F., Collins, C., Gout, P. and Wang, Y., 2014. GATA2: Potential role as a prostate cancer metastasis-driving gene.

- Chin, C.H., Chen, S.H., Wu, H.H., Ho, C.W., Ko, M.T. and Lin, C.Y., 2014. cytoHubba: identifying hub objects and sub-networks from complex interactome. *BMC systems biology*, 8(4), p.S11.
- Cotto, K.C., Wagner, A.H., Feng, Y.Y., Kiwala, S., Coffman, A.C., Spies, G., Wollam, A., Spies, N.C., Griffith, O.L. and Griffith, M., 2017. DGIdb 3.0: a redesign and expansion of the drug–gene interaction database. *Nucleic acids research*, 46(D1), pp.D1068-D1073.
- Crow, M., Lim, N., Ballouz, S., Pavlidis, P. and Gillis, J., 2019. Predictability of human differential gene expression. *Proceedings of the National Academy of Sciences*, 116(13), pp.6491-6500.
- Elfar, M. and Amleh, A., 2019. miR-590-3p and Its Downstream Target Genes in HCC Cell Lines. *Analytical Cellular Pathology*, 2019.
- Elnemr, A., Ohta, T., Iwata, K., Ninomia, I., Fushida, S., Nishimura, G., Kitagawa, H., Kayahara, M., Yamamoto, M., Terada, T. and Miwa, K., 2000. PPARgamma ligand (thiazolidinedione) induces growth arrest and differentiation markers of human pancreatic cancer cells. *International journal of oncology*, 17(6), pp.1157-1221.
- Furukawa, T., 2009. Molecular pathology of pancreatic cancer: implications for molecular targeting therapy. *Clinical Gastroenterology and Hepatology*, 7(11), pp.S35-S39.
- Guo, C., Liu, S., Wang, J., Sun, M.Z. and Greenaway, F.T., 2013. ACTB in cancer. *Clinica Chimica Acta*, 417, pp.39-44.
- Han, L., Wang, W., Ding, W. and Zhang, L., 2017. MiR-9 is involved in TGF- $\beta$ 1-induced lung cancer cell invasion and adhesion by targeting SOX 7. *Journal of cellular and molecular medicine*, 21(9), pp.2000-2008.



- Hatfield, G.W., Hung, S.P. and Baldi, P., 2003. Differential analysis of DNA microarray gene expression data. *Molecular microbiology*, 47(4), pp.871-877.
- He, X. and Zhang, J., 2006. Why do hubs tend to be essential in protein networks?. *PLoS genetics*, 2(6), p.e88.
- Hedrick, E. and Safe, S., 2017. TGF $\beta$ /NR4A1 Inducible Breast Cancer Cell Migration and Epithelial to Mesenchymal Transition is p38 $\alpha$  (MAPK14) Dependent. *Molecular and Cellular Biology*, pp.MCB-00306.
- Holmes, W.F., Braastad, C.D., Mitra, P., Hampe, C., Doenecke, D., Albig, W., Stein, J.L., Van Wijnen, A.J. and Stein, G.S., 2005. Coordinate control and selective expression of the full complement of replication-dependent histone H4 genes in normal and cancer cells. *Journal of Biological Chemistry*, 280(45), pp.37400-37407.
- Huang, Z., Chen, W., Du, Y., Guo, Q., Mao, Y., Zhou, X. and Hua, D., 2019. Serum miR-16 as a potential biomarker for human cancer diagnosis: results from a large-scale population. *Journal of cancer research and clinical oncology*, 145(3), pp.787-796.
- Jiang, H., Xu, M., Li, L., Grierson, P., Dodhiawala, P., Highkin, M., Zhang, D., Li, Q., Wang-Gillam, A. and Lim, K.H., 2018. Concurrent HER or PI3K inhibition potentiates the antitumor effect of the ERK inhibitor ulixertinib in preclinical pancreatic cancer models. *Molecular cancer therapeutics*, 17(10), pp.2144-2155.
- Kanayama, H.O., Tanaka, K., Aki, M., Kagawa, S., Miyaji, H., Satoh, M., Okada, F., Sato, S., Shimbara, N. and Ichihara, A., 1991. Changes in expressions of proteasome and ubiquitin genes in human renal cancer cells. *Cancer research*, 51(24), pp.6677-6685.

- Larki, P. and Ahadi, A., 2018. Up-regulation of miR-21, miR-25, miR-93, and miR-106b in gastric cancer. *Iranian biomedical journal*, 22(6), p.367.
- Lee, E.J., Gusev, Y., Jiang, J., Nuovo, G.J., Lerner, M.R., Frankel, W.L., Morgan, D.L., Postier, R.G., Brackett, D.J. and Schmittgen, T.D., 2007. Expression profiling identifies microRNA signature in pancreatic cancer. *International journal of cancer*, 120(5), pp.1046-1054.
- Lee, H.K., Lee, D.S. and Park, J.C., 2015. Nuclear factor IC regulates E-cadherin via control of KLF4 in breast cancer. *BMC cancer*, 15(1), p.113.
- Li, W., LeBrun, D.G. and Li, M., 2011. The expression and functions of microRNAs in pancreatic adenocarcinoma and hepatocellular carcinoma. *Chinese journal of cancer*, 30(8), p.540.
- Li, X., Ding, X. and Adrian, T.E., 2003. Arsenic trioxide induces apoptosis in pancreatic cancer cells via changes in cell cycle, caspase activation, and GADD expression. *Pancreas*, 27(2), pp.174-179.
- Li, X.W., Tuergan, M. and Abulizi, G., 2015. Expression of MAPK1 in cervical cancer and effect of MAPK1 gene silencing on epithelial-mesenchymal transition, invasion and metastasis. *Asian Pacific journal of tropical medicine*, 8(11), pp.937-943.
- Li, Y., Hu, W., Shen, D.Y., Kavanagh, J.J. and Fu, S., 2009. Azacitidine enhances sensitivity of platinum-resistant ovarian cancer cells to carboplatin through induction of apoptosis. *American journal of obstetrics and gynecology*, 200(2), pp.177-e1.
- Maitra, Anirban, and Ralph H. Hruban. "Pancreatic cancer." *Annu. Rev. pathmechdis. Mech.*

- Dis.* 3 (2008): 157-188.
- Martinez, N.J. and Walhout, A.J., 2009. The interplay between transcription factors and microRNAs in genome-scale regulatory networks. *Bioessays*, 31(4), pp.435-445.
- Molavi, G., Samadi, N. and Hosseingholi, E.Z., 2019. The roles of moonlight ribosomal proteins in the development of human cancers. *Journal of cellular physiology*, 234(6), pp.8327-8341.
- Nawrocki, S.T., Carew, J.S., Dunner, K., Boise, L.H., Chiao, P.J., Huang, P., Abbruzzese, J.L. and McConkey, D.J., 2005. Bortezomib inhibits PKR-like endoplasmic reticulum (ER) kinase and induces apoptosis via ER stress in human pancreatic cancer cells. *Cancer research*, 65(24), pp.11510-11519.
- Nunes, I.J.G., 2018. Gene expression analysis platform (GEAP): uma plataforma flexível e intuitiva para análise de transcriptoma.
- Ocejo-Garcia, M., Baokbah, T.A., Louise Ashurst, H., Cowlshaw, D., Soomro, I., Coulson, J.M. and Woll, P.J., 2005. Roles for USF2 in lung cancer proliferation and bronchial carcinogenesis. *The Journal of Pathology: A Journal of the Pathological Society of Great Britain and Ireland*, 206(2), pp.151-159.
- Orth, M., Metzger, P., Gerum, S., Mayerle, J., Schneider, G., Belka, C., Schnurr, M. and Lauber, K., 2019. Pancreatic ductal adenocarcinoma: biological hallmarks, current status, and future perspectives of combined modality treatment approaches. *Radiation Oncology*, 14(1), pp.1-20.
- Peng, X.H., Huang, H.R., Lu, J., Liu, X., Zhao, F.P., Zhang, B., Lin, S.X., Wang, L., Chen, H.H.,

- Xu, X. and Wang, F., 2014. MiR-124 suppresses tumor growth and metastasis by targeting Foxq1 in nasopharyngeal carcinoma. *Molecular cancer*, 13(1), p.186.
- Pepe, M.S., Longton, G., Anderson, G.L. and Schummer, M., 2003. Selecting differentially expressed genes from microarray experiments. *Biometrics*, 59(1), pp.133-142.
- Pon, J.R. and Marra, M.A., 2016. MEF2 transcription factors: developmental regulators and emerging cancer genes. *Oncotarget*, 7(3), p.2297.
- Rahib, L., Smith, B.D., Aizenberg, R., Rosenzweig, A.B., Fleshman, J.M. and Matrisian, L.M., 2014. Projecting cancer incidence and deaths to 2030: the unexpected burden of thyroid, liver, and pancreas cancers in the United States. *Cancer research*, 74(11), pp.2913-2921.
- Rawla, P., Sunkara, T. and Gaduputi, V., 2019. Epidemiology of Pancreatic Cancer: Global Trends, Etiology and Risk Factors. *World journal of oncology*, 10(1), p.10.
- Rhee, S.Y., Wood, V., Dolinski, K. and Draghici, S., 2008. Use and misuse of the gene ontology annotations. *Nature Reviews Genetics*, 9(7), p.509.
- Rubie, C., Kempf, K., Hans, J., Su, T., Tilton, B., Georg, T., Brittner, B., Ludwig, B. and Schilling, M., 2005. Housekeeping gene variability in normal and cancerous colorectal, pancreatic, esophageal, gastric and hepatic tissues. *Molecular and cellular probes*, 19(2), pp.101-109.
- Sandelin, A., Alkema, W., Engström, P., Wasserman, W.W. and Lenhard, B., 2004. JASPAR: an open access database for eukaryotic transcription factor binding profiles. *Nucleic acids research*, 32(suppl\_1), pp.D91-D94.

- Schild, C., Wirth, M., Reichert, M., Schmid, R.M., Saur, D. and Schneider, G., 2009. PI3K signaling maintains c-myc expression to regulate transcription of E2F1 in pancreatic cancer cells. *Molecular Carcinogenesis: Published in cooperation with the University of Texas MD Anderson Cancer Center*, 48(12), pp.1149-1158.
- Sethupathy, P., Corda, B. and Hatzigeorgiou, A.G., 2006. TarBase: A comprehensive database of experimentally supported animal microRNA targets. *Rna*, 12(2), pp.192-197.
- Shannon, P., Markiel, A., Ozier, O., Baliga, N.S., Wang, J.T., Ramage, D., Amin, N., Schwikowski, B. and Ideker, T., 2003. Cytoscape: a software environment for integrated models of biomolecular interaction networks. *Genome research*, 13(11), pp.2498-2504.
- Sherman, B.T. and Lempicki, R.A., 2009. Systematic and integrative analysis of large gene lists using DAVID bioinformatics resources. *Nature protocols*, 4(1), pp.44-57.
- Shibuya, K.C., Goel, V.K., Xiong, W., Sham, J.G., Pollack, S.M., Leahy, A.M., Whiting, S.H., Yeh, M.M., Yee, C., Riddell, S.R. and Pillarisetty, V.G., 2014. Pancreatic ductal adenocarcinoma contains an effector and regulatory immune cell infiltrate that is altered by multimodal neoadjuvant treatment. *PloS one*, 9(5), p.e96565.
- Singh, R., Yadav, V. and Saini, N., 2015. MicroRNA-195 inhibits proliferation, invasion and metastasis in breast cancer cells by targeting FASN, HMGCR, ACACA and CYP27B1. *Scientific reports*, 5, p.17454.
- Siri, F.H. and Salehiniya, H., 2019. Pancreatic Cancer in Iran: an Epidemiological Review. *Journal of gastrointestinal cancer*, pp.1-7.

- Stelzl, U. and Wanker, E.E., 2006. The value of high quality protein–protein interaction networks for systems biology. *Current opinion in chemical biology*, 10(6), pp.551-558.
- Stricker, T.P., Brown, C.D., Bandlamudi, C., McNerney, M., Kittler, R., Montoya, V., Peterson, A., Grossman, R. and White, K.P., 2017. Robust stratification of breast cancer subtypes using differential patterns of transcript isoform expression. *PLoS genetics*, 13(3), p.e1006589.
- Szklarczyk, D., Morris, J.H., Cook, H., Kuhn, M., Wyder, S., Simonovic, M., Santos, A., Doncheva, N.T., Roth, A., Bork, P. and Jensen, L.J., 2016. The STRING database in 2017: quality-controlled protein–protein association networks, made broadly accessible. *Nucleic acids research*, p.gkw937.
- Tang, Y., Geng, Y., Luo, J., Shen, W., Zhu, W., Meng, C., Li, M., Zhou, X., Zhang, S. and Cao, J., 2015. Downregulation of ubiquitin inhibits the proliferation and radioresistance of non-small cell lung cancer cells in vitro and in vivo. *Scientific reports*, 5, p.9476.
- Tang, Z., Yu, W., Zhang, C., Zhao, S., Yu, Z., Xiao, X., Tang, R., Xuan, Y., Yang, W., Hao, J. and Xu, T., 2016. CREB-binding protein regulates lung cancer growth by targeting MAPK and CPSF4 signaling pathway. *Molecular oncology*, 10(2), pp.317-329.
- Ullah, M.A., Sarkar, B., Araf, Y., Prottoy, M.N.I., Saha, A., Jahan, T., Boby, A.S. and Islam, M.S., 2019. Integrated Bioinformatic Approach to Identify Potential Biomarkers against Idiopathic Pulmonary Fibrosis. *medRxiv*.
- Ushijima, H., Horyozaki, A. and Maeda, M., 2016. Anisomycin-induced GATA-6 degradation accompanying a decrease of proliferation of colorectal cancer cell. *Biochemical and biophysical research communications*, 478(1), pp.481-485.

- van Dam, S., Vosa, U., van der Graaf, A., Franke, L. and de Magalhaes, J.P., 2017. Gene co-expression analysis for functional classification and gene–disease predictions. *Briefings in bioinformatics*, 19(4), pp.575-592.
- van der Deen, M., Medina, R., Xie, R.L., Stein, J., Stein, G. and van Wijnen, A., 2009. Abstract# 1264: Histone H4 gene regulation in cancer cells by the transcription factor HiNF-P identified by CHIP-on-chip analysis.
- Vidal, M., Cusick, M.E. and Barabási, A.L., 2011. Interactome networks and human disease. *Cell*, 144(6), pp.986-998.
- Wang, H., Deng, G., Ai, M., Xu, Z., Mou, T., Yu, J., Liu, H., Wang, S. and Li, G., 2019. Hsp90ab1 stabilizes LRP5 to promote epithelial–mesenchymal transition via activating of AKT and Wnt/ $\beta$ -catenin signaling pathways in gastric cancer progression. *Oncogene*, 38(9), p.1489.
- Wang, L., Gu, F., Liu, C.Y., Wang, R.J., Li, J. and Xu, J.Y., 2013. High level of FOXC1 expression is associated with poor prognosis in pancreatic ductal adenocarcinoma. *Tumor Biology*, 34(2), pp.853-858.
- Wang, Y., Chen, Y., Jiang, H., Tang, W., Kang, M., Liu, T., Guo, Z. and Ma, Z., 2015. Peroxisome proliferator-activated receptor gamma (PPARG) rs1801282 C> G polymorphism is associated with cancer susceptibility in asians: an updated meta-analysis. *International journal of clinical and experimental medicine*, 8(8), p.12661.
- Wei, D., Le, X., Zheng, L., Wang, L., Frey, J.A., Gao, A.C., Peng, Z., Huang, S., Xiong, H.Q., Abbruzzese, J.L. and Xie, K., 2003. Stat3 activation regulates the expression of vascular

- endothelial growth factor and human pancreatic cancer angiogenesis and metastasis. *Oncogene*, 22(3), p.319.
- Wu, D., Niu, X., Pan, H., Zhang, Z., Zhou, Y., Qu, P. and Zhou, J., 2016. MicroRNA-497 targets hepatoma-derived growth factor and suppresses human prostate cancer cell motility. *Molecular medicine reports*, 13(3), pp.2287-2292.
- Xia, J., Gill, E.E. and Hancock, R.E., 2015. NetworkAnalyst for statistical, visual and network-based meta-analysis of gene expression data. *Nature protocols*, 10(6), p.823.
- Xu, X., Wu, X., Jiang, Q., Sun, Y., Liu, H., Chen, R. and Wu, S., 2015. Downregulation of microRNA-1 and microRNA-145 contributes synergistically to the development of colon cancer. *International journal of molecular medicine*, 36(6), pp.1630-1638.
- Yamazaki, K., Masugi, Y., Effendi, K., Tsujikawa, H., Hiraoka, N., Kitago, M., Shinoda, M., Itano, O., Tanabe, M., Kitagawa, Y. and Sakamoto, M., 2014. Upregulated SMAD3 promotes epithelial–mesenchymal transition and predicts poor prognosis in pancreatic ductal adenocarcinoma. *Laboratory investigation*, 94(6), p.683.
- Yuan, P., He, X.H., Rong, Y.F., Cao, J., Li, Y., Hu, Y.P., Liu, Y., Li, D., Lou, W. and Liu, M.F., 2017. KRAS/NF- $\kappa$ B/YY1/miR-489 signaling axis controls pancreatic cancer metastasis. *Cancer research*, 77(1), pp.100-111.
- Zhang, G., He, P., Gaedcke, J., Ghadimi, B.M., Ried, T., Yfantis, H.G., Lee, D.H., Hanna, N., Alexander, H.R. and Hussain, S.P., 2013. FOXL1, a novel candidate tumor suppressor, inhibits tumor aggressiveness and predicts outcome in human pancreatic cancer. *Cancer research*, 73(17), pp.5416-5425.



Zhu, K. and Wang, W., 2016. Green tea polyphenol EGCG suppresses osteosarcoma cell growth through upregulating miR-1. *Tumor Biology*, 37(4), pp.4373-4382.

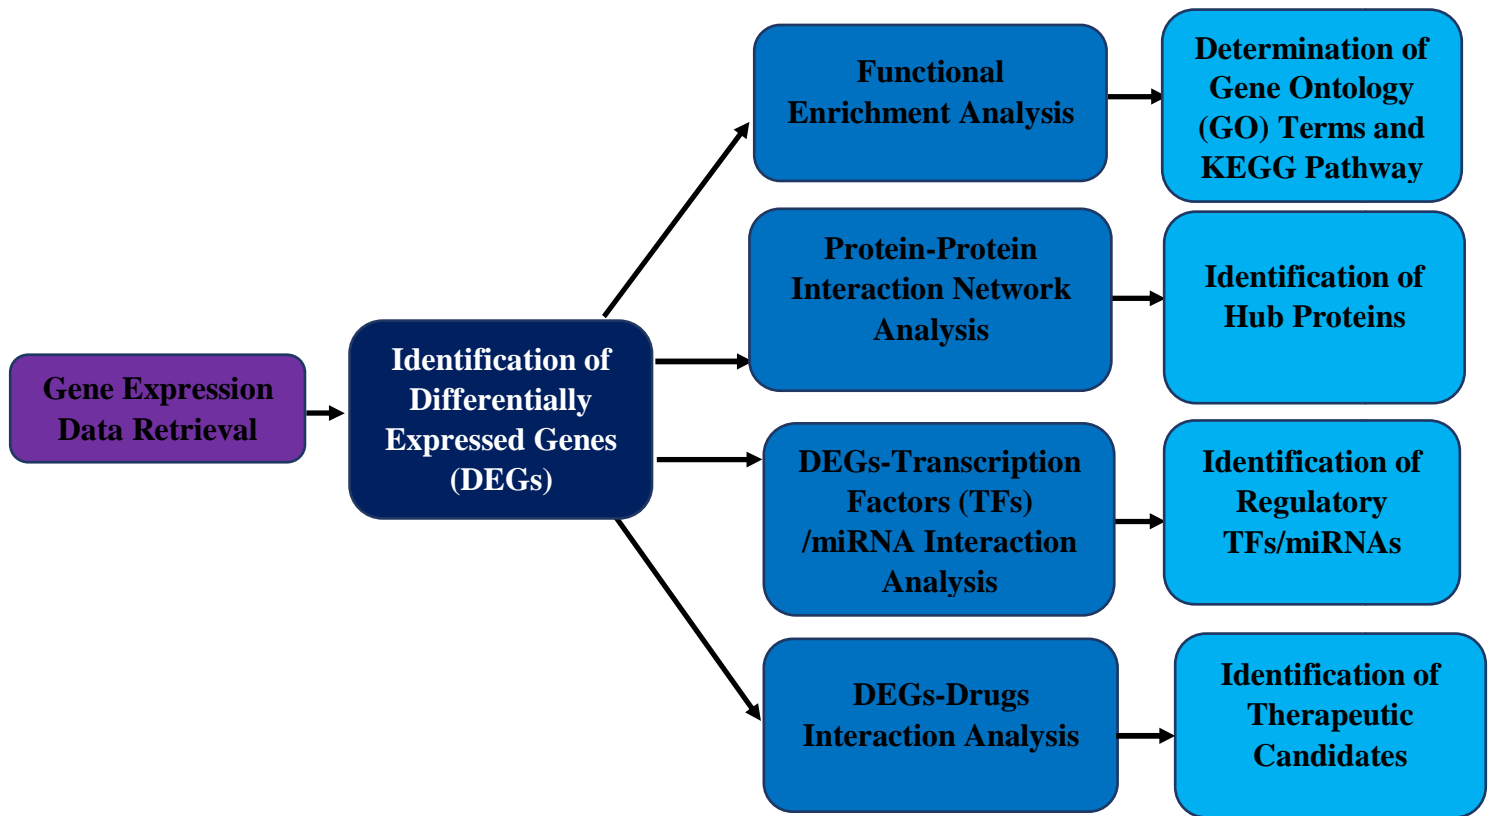

**Figure 1:** Strategies employed in the overall study.

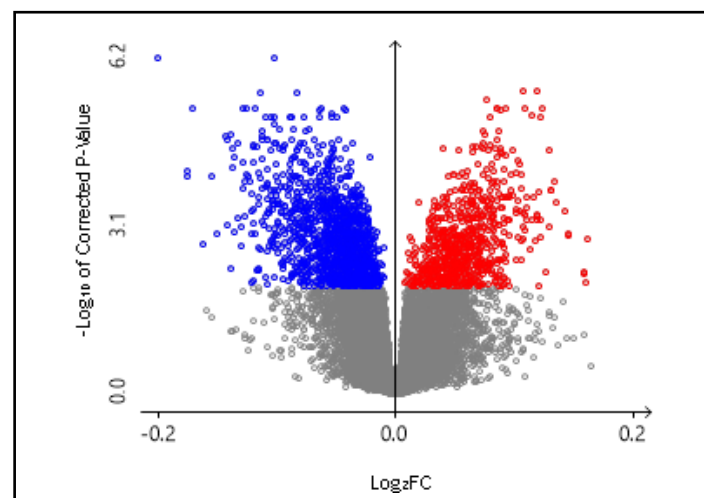

**Figure 2:** Volcano plot of selected differentially expressed genes (DEGs). Colored (Blue: Down regulated genes; Red: Upregulated genes) DEGs have been selected with adjusted P value > 0.01. filter.

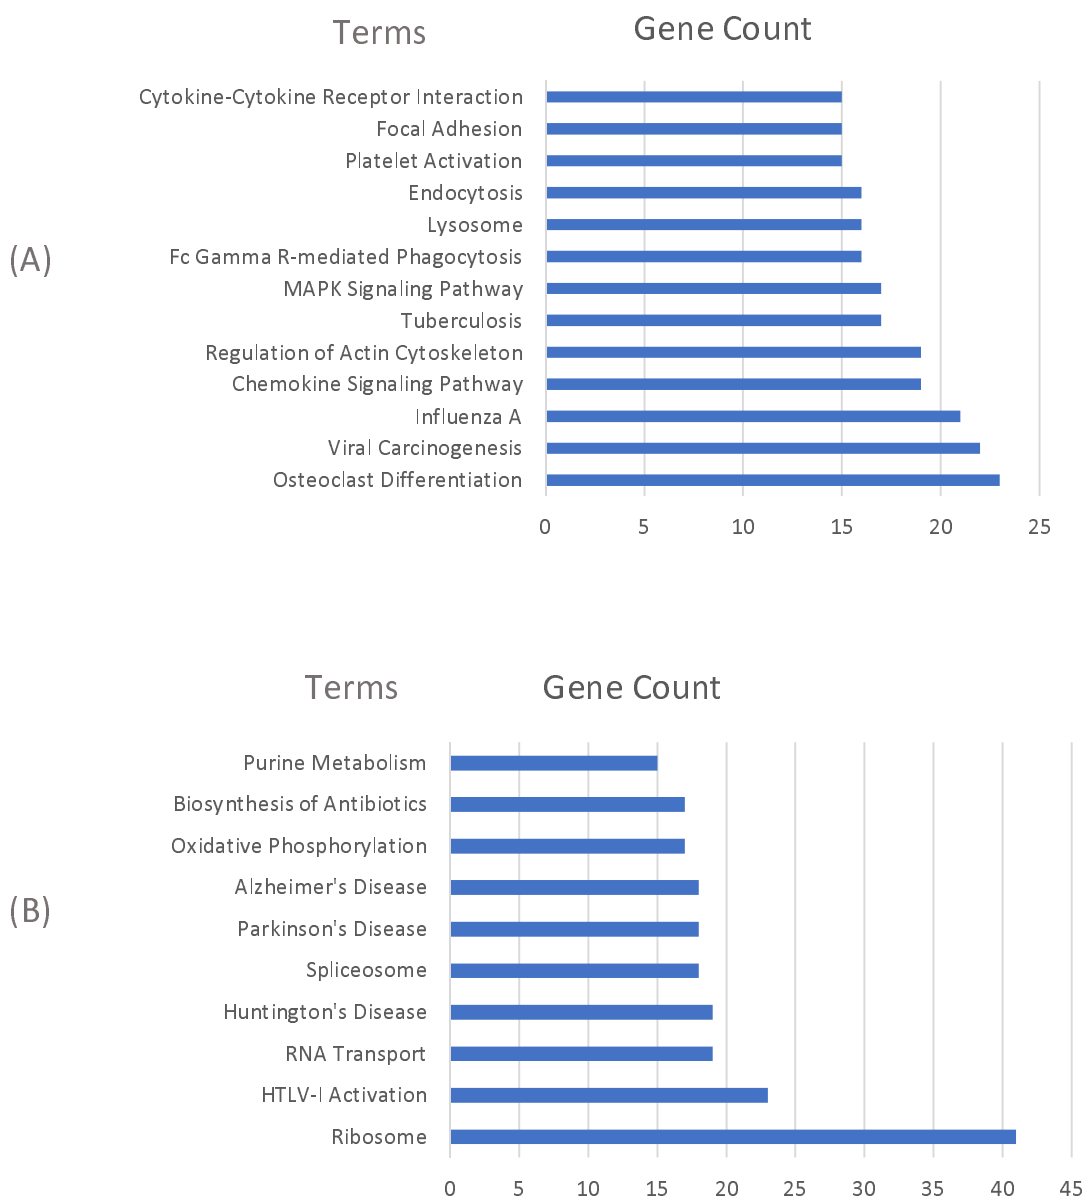

**Figure 3:** KEGG pathway of differentially expressed genes: (A) Upregulated genes; (B) Downregulated genes.



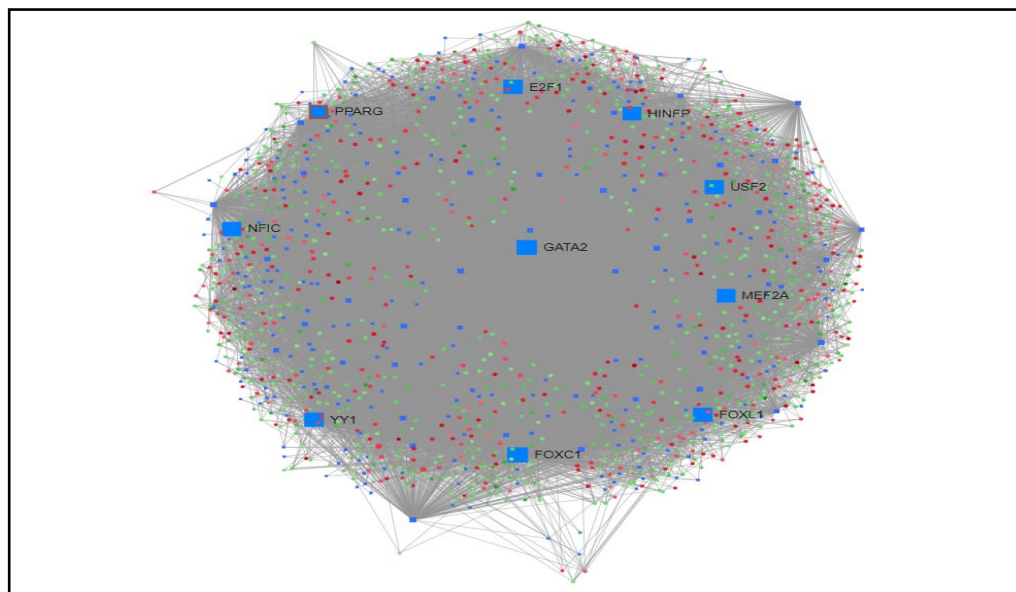

**Figure 6:** Interaction between transcription factor (TF) and differentially expressed genes network of differentially expressed genes (DEGs). Nodes represent DEGs (Green: Upregulated genes; Red: Downregulated genes; Blue: Transcription factors). Edges represent interaction.

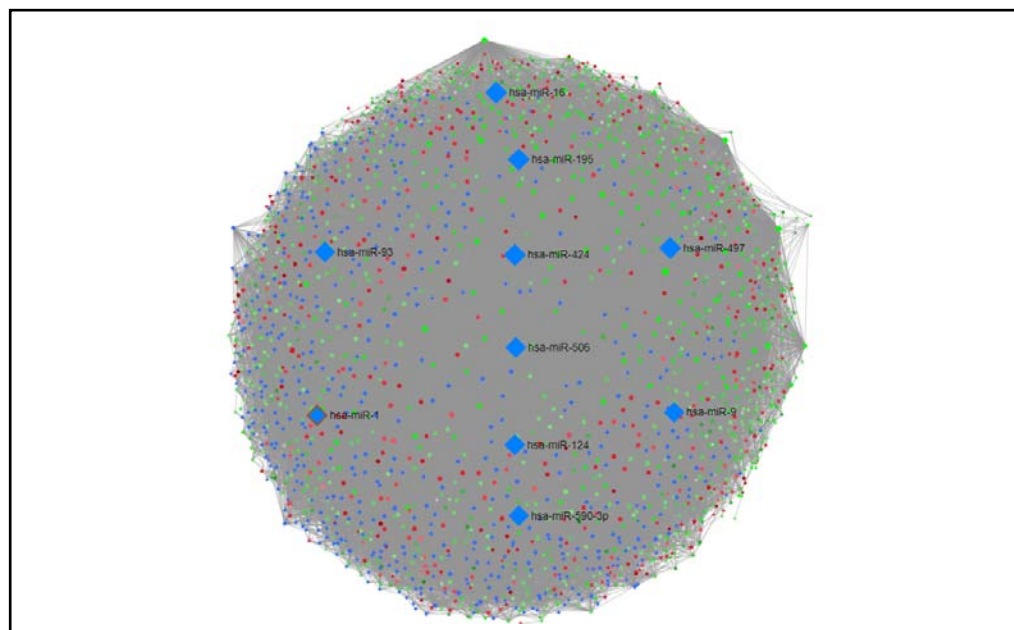

**Figure 7:** Interaction between miRNA and differentially expressed genes network of differentially expressed genes (DEGs). Nodes represent DEGs (Green: Upregulated genes; Red: Downregulated genes; Blue: miRNA). Edges represent interaction.

| <b>Upregulated Genes</b>                        |                                                                   |                   |                     |                |
|-------------------------------------------------|-------------------------------------------------------------------|-------------------|---------------------|----------------|
| <b>Biological Processes</b>                     | <b>Terms</b>                                                      | <b>Gene Count</b> | <b>Coverage (%)</b> | <b>P-Value</b> |
|                                                 | Signal Transduction                                               | 55                | 10.70               | 7.0E-5         |
|                                                 | Innate Immune Response                                            | 31                | 6.00                | 2.3E-6         |
|                                                 | Protein Phosphorylation                                           | 29                | 5.60                | 5.2E-5         |
|                                                 | Apoptotic Process                                                 | 27                | 5.30                | 6.4E-3         |
|                                                 | Viral Process                                                     | 25                | 4.90                | 2.3E-6         |
|                                                 | Oxidation-reduction Process                                       | 25                | 4.90                | 3.3E-2         |
|                                                 | Positive Regulation of GTPase Activity                            | 24                | 4.70                | 3.5E-2         |
|                                                 | Cell Adhesion                                                     | 21                | 4.10                | 2.6E-2         |
|                                                 | Inflammatory Response                                             | 20                | 3.90                | 7.7E-3         |
|                                                 | Immune Response                                                   | 20                | 3.90                | 2.1E-2         |
| <b>Cellular Component</b>                       | Cytoplasm                                                         | 174               | 33.90               | 2.0E-4         |
|                                                 | Plasma Membrane                                                   | 152               | 29.60               | 3.3E-6         |
|                                                 | Cytosol                                                           | 146               | 28.40               | 5.4E-11        |
|                                                 | Extracellular Exosome                                             | 132               | 25.70               | 9.3E-12        |
|                                                 | Membrane                                                          | 99                | 19.30               | 8.3E-8         |
|                                                 | Integral Component of Plasma Membrane                             | 57                | 11.10               | 1.4E-3         |
|                                                 | Focal Adhesion                                                    | 39                | 7.60                | 4.0E-12        |
|                                                 | Golgi Apparatus                                                   | 34                | 6.60                | 2.0E-2         |
|                                                 | Perinuclear Region of Cytoplasm                                   | 30                | 5.80                | 2.1E-3         |
|                                                 | Cell Surface                                                      | 23                | 4.50                | 3.0E-2         |
| <b>Molecular Function</b>                       | Protein Binding                                                   | 297               | 57.80               | 1.2E-8         |
|                                                 | ATP Binding                                                       | 62                | 12.10               | 7.5E-4         |
|                                                 | Protein Homodimerization Activity                                 | 32                | 6.20                | 9.0E-3         |
|                                                 | Identical Protein Binding                                         | 31                | 6.00                | 2.0E-2         |
|                                                 | Protein Serine-threonine Kinase Activity                          | 24                | 4.70                | 2.4E-4         |
|                                                 | Protein Kinase Binding                                            | 22                | 4.30                | 1.4E-3         |
|                                                 | Protein Heterodimerization Activity                               | 22                | 4.30                | 1.6E-2         |
|                                                 | Protein Kinase Activity                                           | 21                | 4.10                | 1.9E-3         |
|                                                 | Receptor Binding                                                  | 19                | 3.70                | 7.8E-3         |
| Cadherin Binding Involved in Cell-cell Adhesion | 17                                                                | 3.10              | 5.7E-3              |                |
| <b>Downregulated Genes</b>                      |                                                                   |                   |                     |                |
| <b>Biological Processes</b>                     | <b>Terms</b>                                                      | <b>Gene Count</b> | <b>Coverage (%)</b> | <b>P-Value</b> |
|                                                 | rRNA Processing                                                   | 54                | 7.10                | 7.8E-27        |
|                                                 | Translation                                                       | 50                | 6.60                | 6.0E-20        |
|                                                 | Translation Initiation                                            | 44                | 5.80                | 1.6E-26        |
|                                                 | Nuclear-mediated mRNA Catabolic Process, Non-sense-mediated Decay | 40                | 5.20                | 5.9E-25        |
|                                                 | Viral Transcription                                               | 38                | 5.00                | 7.1E-24        |
|                                                 | SRP-dependent Cotranslational Protein Targeting to Membrane       | 36                | 4.80                | 1.1E-24        |
|                                                 | mRNA Splicing Via Spliceosome                                     | 30                | 3.90                | 4.1E-8         |
|                                                 | Regulation of Transcription from RNA Polymerase II Promoter       | 30                | 3.90                | 9.5E-3         |
|                                                 | Immune Response                                                   | 29                | 3.80                | 9.3E-3         |
|                                                 | Negative Regulation of Apoptotic Process                          | 27                | 3.50                | 6.0E-2         |
| <b>Cellular Component</b>                       | Nucleus                                                           | 296               | 38.80               | 1.3E-10        |
|                                                 | Cytoplasm                                                         | 249               | 32.70               | 6.2E-4         |
|                                                 | Cytosol                                                           | 210               | 27.60               | 7.8E-13        |
|                                                 | Nucleoplasm                                                       | 192               | 25.20               | 3.9E-15        |
|                                                 | Extracellular Exosome                                             | 148               | 19.40               | 2.5E-4         |
|                                                 | Membrane                                                          | 131               | 17.20               | 2.1E-6         |
|                                                 | Mitochondria                                                      | 105               | 13.80               | 2.0E-11        |

|                           |                                                 |     |       |         |
|---------------------------|-------------------------------------------------|-----|-------|---------|
|                           | Nucleolus                                       | 89  | 11.70 | 2.6E-16 |
|                           | Mitochondria Inner Membrane                     | 52  | 6.80  | 8.4E-12 |
|                           | Ribosome                                        | 41  | 5.40  | 1.4E-20 |
| <b>Molecular Function</b> | Protein Binding                                 | 463 | 60.80 | 2.6E-17 |
|                           | Poly(A) RNA Binding                             | 135 | 17.70 | 9.2E-31 |
|                           | RNA Binding                                     | 70  | 9.20  | 2.4E-17 |
|                           | Structural Constituent of Ribosome              | 50  | 6.60  | 7.3E-23 |
|                           | Protein Kinase Binding                          | 24  | 3.10  | 3.4E-2  |
|                           | Cadherin Binding Involved in Cell-cell Adhesion | 22  | 2.90  | 7.7E-3  |
|                           | Nucleotide Binding                              | 21  | 2.80  | 7.5E-2  |
|                           | Transcription Factor Binding                    | 19  | 2.50  | 4.2E-2  |
|                           | Unfolded Protein Binding                        | 12  | 1.60  | 5.1E-3  |
|                           | Translation Initiation Factor Activity          | 9   | 1.20  | 3.1E-3  |

**Table 1:** Top 10 gene ontology (GO) terms of differentially expressed genes (DEGs) in PDAC.

| <b>Hub Proteins</b> | <b>Description</b>                                 | <b>Functional Category</b> | <b>Clinical Significance</b>               | <b>References</b>                          |
|---------------------|----------------------------------------------------|----------------------------|--------------------------------------------|--------------------------------------------|
| CREBBP              | CREB Binding Protein                               | Transcription co-activator | Involved in PDAC and Lung Cancer.          | (Arensman et al., 2014; Tang et al., 2016) |
| MAPK14              | Mitogen-Activated Protein Kinase 14                | Serine-threonine kinase    | Involved in Breast Cancer.                 | (Hedrick and Safe, 2017)                   |
| MAPK1               | Mitogen-Activated Protein Kinase 1                 | Serine-threonine kinase    | Involved in Cervical Cancer and PDAC.      | (Li et al., 2015; Furukawa, 2009)          |
| SMAD3               | Mothers against decapentaplegic homolog 3          | Signal transducer          | Involved in PDAC.                          | (Yamazaki et al., 2014)                    |
| UBC                 | Ubiquitin C                                        | Signal transducer          | Involved in Lung Cancer and Renal Cancer.  | (Tang et al., 2015)                        |
| MAGOH               | Protein Mago Nashi Homolog                         | Component of spliceosome   | Involved in Breast Cancer.                 | (Stricker et al., 2017)                    |
| STAT3               | Signal Transducer and Activator of Transcription 3 | Signal transducer          | Involved in PDAC.                          | (Wei et al., 2003)                         |
| ACTB                | Beta-Actin                                         | Cytoskeletal actin         | Involved in PDAC and other form of cancer. | (Rubie et al., 2005; Guo et al., 2013)     |
| RPL23A              | Ribosomal Protein L23a                             | Ribosomal protein          | Involved in Liver Cancer.                  | (Molavi et al., 2019)                      |
| HSP90AB1            | Heat Shock Protein 90-beta                         | Molecular chaperone        | Involved in Gastric Cancer.                | (Wang et al., 2019)                        |

**Table 2:** Summary of the identified hub proteins from PPI network.

| <b>Transcription Factors</b> | <b>Description</b>                               | <b>Clinical Significance</b>        | <b>References</b>                        |
|------------------------------|--------------------------------------------------|-------------------------------------|------------------------------------------|
| GATA2                        | GATA Binding Factor 2                            | Involved in Prostate Cancer.        | (Chiang et al., 2014)                    |
| FOXC1                        | Forkhead Box C1                                  | Involved in PDAC.                   | (Wang et al., 2013)                      |
| PPARG                        | Peroxisome Proliferator Activated Receptor Gamma | Involved in PDAC and other cancers. | (Wang et al., 2015; Elnemr et al., 2000) |
| E2F1                         | E2F Transcription Factor 1                       | Involved in PDAC.                   | (Schild et al., 2009)                    |
| HINFP                        | Histone Nuclear factor                           | Involved in different cancers.      | (Holmes et al., 2005, van et al., 2009)  |
| USF2                         | Upstream Stimulatory Factor 2                    | Involved in Lung Cancer.            | (Ocejo-Garcia et al., 2005)              |
| MEF2A                        | Myocyte enhancer factor-2A                       | Involved in Liver Cancer.           | (Pon and Marra, 2016)                    |
| FOXL1                        | Forkhead Box L1                                  | Involved in PDAC.                   | (Zhang et al., 2013)                     |
| YY1                          | Yin Yang 1                                       | Involved in PDAC.                   | (Yuan et al., 2017)                      |
| NFIC                         | Nuclear Factor 1-C                               | Involved in Breast Cancer.          | (Lee et al., 2015)                       |

**Table 3:** Summary of the selected TFs from TFs-DEGs network.



| <b>MiRNAs</b>  | <b>Description</b>                                 | <b>Clinical Significance</b>         | <b>References</b>                             |
|----------------|----------------------------------------------------|--------------------------------------|-----------------------------------------------|
| hsa-miR-93     | <i>Homo sapiens</i> micro-ribonucleic acid -93     | Involved in Gastric Cancer           | (Larki <i>et al.</i> , 2018)                  |
| hsa-miR-16     | <i>Homo sapiens</i> micro-ribonucleic acid -16     | Involved in PDAC                     | (Huang <i>et al.</i> , 2019)                  |
| hsa-miR-195    | <i>Homo sapiens</i> micro-ribonucleic acid -195    | Involved in Breast Cancer            | (Singh <i>et al.</i> , 2015)                  |
| hsa-miR-424    | <i>Homo sapiens</i> micro-ribonucleic acid -424    | Involved in PDAC                     | (Lee <i>et al.</i> , 2007)                    |
| hsa-miR-506    | <i>Homo sapiens</i> micro-ribonucleic acid -506    | Involved in Cervical Cancer          | (Li <i>et al.</i> , 2011)                     |
| hsa-miR-124    | <i>Homo sapiens</i> micro-ribonucleic-acid -124    | Involved in Nasopharyngeal Carcinoma | (Peng <i>et al.</i> , 2014)                   |
| hsa-miR-590-3p | <i>Homo sapiens</i> micro-ribonucleic acid -590-3p | Involved in Colorectal Cancer        | (Elfar <i>et al.</i> , 2019)                  |
| hsa-miR-1      | <i>Homo sapiens</i> micro-ribonucleic acid -1      | Involved in PDAC and Colon Cancer    | (Zhu and Wang, 2016; Xu <i>et al.</i> , 2015) |
| hsa-miR-497    | <i>Homo sapiens</i> micro-ribonucleic acid -497    | Involved in different cancer         | (Wu <i>et al.</i> , 2016)                     |
| hsa-miR-9      | <i>Homo sapiens</i> micro-ribonucleic acid -9      | Involved in Lung Cancer              | (Han <i>et al.</i> , 2017)                    |

**Table 4:** Summary of the selected miRNAs from miRNAs-DEGs network.

|                     | Target Name                  | Drug Name            | Drug Category                                                                              | Drug Group                                                               | Drug Score |
|---------------------|------------------------------|----------------------|--------------------------------------------------------------------------------------------|--------------------------------------------------------------------------|------------|
| <b>Hub Proteins</b> | CREBBP                       | Methylphenidate      | Membrane transport modulator, CNS stimulant, Neurotransmitter Uptake Inhibitor             | Approved                                                                 | 2          |
|                     | MAPK14                       | SB-220025            | Calcium-calmodulin-dependent protein kinases, antagonists & inhibitor                      | Experimental                                                             | 5          |
|                     |                              | Talmapimod           | Heterocyclic compound                                                                      | Investigational                                                          | 4          |
|                     |                              | Vasopressin          | Cardiovascular agent, Anti-diuretic agents, vasoconstrictor agent                          | Approved                                                                 | 3          |
|                     | MAPK1                        | Isoprenaline         | Cardiovascular agent, Respiratory agent, Peripheral nervous system agent, Protective agent | Approved                                                                 | 7          |
|                     |                              | Arsenic Trioxide     | Growth inhibitor, Antineoplastic agent, Myelosuppressive agent                             | Approved                                                                 | 4          |
|                     |                              | Ulixertinib          | MAP kinase inhibitor                                                                       | Experimental                                                             | 2          |
|                     | GRB2                         | Pegademase Bovine    | Nucleoside deaminase, Drug carriers, Aminohydrolase                                        | Approved                                                                 | 2          |
|                     |                              | Dactinomycin         | Nucleic acid synthesis inhibitor, Myelosuppressive agent, Immunosuppressive agent          | Approved                                                                 | 2          |
|                     | RPL23A                       | Puromycin            | Enzyme inhibitor, Antineoplastic agent, Antiparasitic agent                                | Experimental                                                             | 2          |
|                     |                              | Anisomycin           | Protein synthesis inhibitor, Nucleic acid synthesis inhibitor, Enzyme inhibitor            | Experimental                                                             | 2          |
|                     | <b>Transcription Factors</b> | GATA2                | Bortezomib                                                                                 | Myelosuppressive agent, Multiple myeloma treatment, Antineoplastic agent | Approved   |
| Epoetin Alpha       |                              |                      | Antiamebic agent                                                                           | Approved                                                                 | 2          |
| Azactidine          |                              |                      | Myelosuppressive agent, Immunosuppressive agent, Enzyme inhibitor                          | Approved                                                                 | 2          |
| PPARG               |                              | Rosilitazone         | Hypoglycemic agent, Enzyme inhibitor                                                       | Approved                                                                 | 11         |
|                     |                              | Piosilitazone        | Hypoglycemic agent, Enzyme inhibitor                                                       | Approved                                                                 | 11         |
|                     |                              | Mesalamine           | Antirheumatic agent, Analgesic, Anti-inflammatory agent                                    | Approved                                                                 | 8          |
|                     |                              | Balsalazide Disodium | Analgesic, Anti-inflammatory agent, Gastrointestinal agent                                 | Approved                                                                 | 6          |
| E2F1                |                              | Etoposide            | Antineoplastic agent                                                                       | Approved                                                                 | 3          |
|                     |                              | Paclitaxel           | Mitosis modulator, Myelosuppressive agent, Tubulin modulators, Immunosuppressive agent     | Approved                                                                 | 2          |
|                     |                              | Bortezomib           | Myelosuppressive agent, Multiple myeloma treatment, Antineoplastic agent                   | Approved                                                                 | 2          |
|                     |                              | Flourouracil         | Myelosuppressive agent, Immunosuppressive agent, Antineoplastic agent                      | Approved                                                                 | 2          |
|                     |                              | Carmustine           | Myelosuppressive agent, Antineoplastic agent                                               | Approved                                                                 | 2          |

**Table 5:** Summary of the selected candidate molecules on the basis of Drug-DEGs interaction.
